# Supplementary material for: Biocatalysis in bio-derived solvents: an improved approach for medium optimisation
Source: Royal Society of Chemistry journal article supplement (doi:10.1039/c3gc42526f), 2014-01-01
Supplement: c3gc42526f.pdf [file c3gc42526f.pdf]

## SUPPLEMENTARY INFORMATION

### Materials:

Immobilised *Candida Antarctica* lipase B (Novozym® 435) was from Novozymes©. All conventional and 'green' solvents as well as the reagents were purchased from SigmaAldrich choosing the highest purity available. Water content was determined for each solvent, as supplied, via Karl-Fischer analysis providing the following results:

| Solvent            | Water [ppm] |
|--------------------|-------------|
| Hexane             | 18.7        |
| p-Cymene           | 158.9       |
| Limonene           | 1255.7      |
| CPME               | 99.0        |
| Toluene            | 212.2       |
| Di-isopropyl ether | 103.4       |
| DCE                | 179.8       |
| Diethylether       | 226.9       |
| MeTHF              | 311.2       |
| Dimethyl carbonate | 376.8       |
| Ethylene carbonate | NA          |
| Chloroform         | 157.9       |
| MEK                | NA          |
| Cyclopentanone     | NA          |
| Acetonitrile       | 118.3       |
| Pyridine           | NA          |
| Acetone            | NA          |
| DMF                | 1066.9      |
| THF                | 148.4       |
| Diethyl carbonate  | 116.2       |
| DMSO               | 8359.6      |

### Typical experimental procedure:

*Candida Antarctica* lipase B (20mg) was added to 20ml of a solution containing 100mM lauric acid and 5mM internal standard - tetradecane. The reaction vessel was stirred and heated to 40°C on a heating plate for it to reach the desired conditions. The mixture was sampled at  $t_0$  and at frequent intervals after the addition of 250uL (0.2044g, 2mmol) of 1-hexanol. The preparation of each GC sample involved filtration on cotton-wool and dilution with DCM.

### GC Method:

Analyses were performed with a Agilent Technologies 6890N Network GC System equipped with FID detector.

Samples were analyzed on a ZB-5HT column (15m X 0.25mm X 0.25mm) and a FID detector in the following conditions: carrier gas (He) at 1 MPa (20 mL/min total flow); temperature programme: 50 °C, 9 °C/min, 190 °C; split ratio 10:1; detector 300 °C. The retention times of compounds were confirmed by standards and appeared as follows: hexanol (4.6 min); tetradecane (internal standard, 9.8 min), lauric acid (11.1 min), hexyl laurate (13.5 min).

The percentage yield was defined through a calibration curve.

\*a slower/lengthened method (2°C/min) was applied in a few cases in which the solvent signal overlapped with the product peak.

### Catalyst reusability:

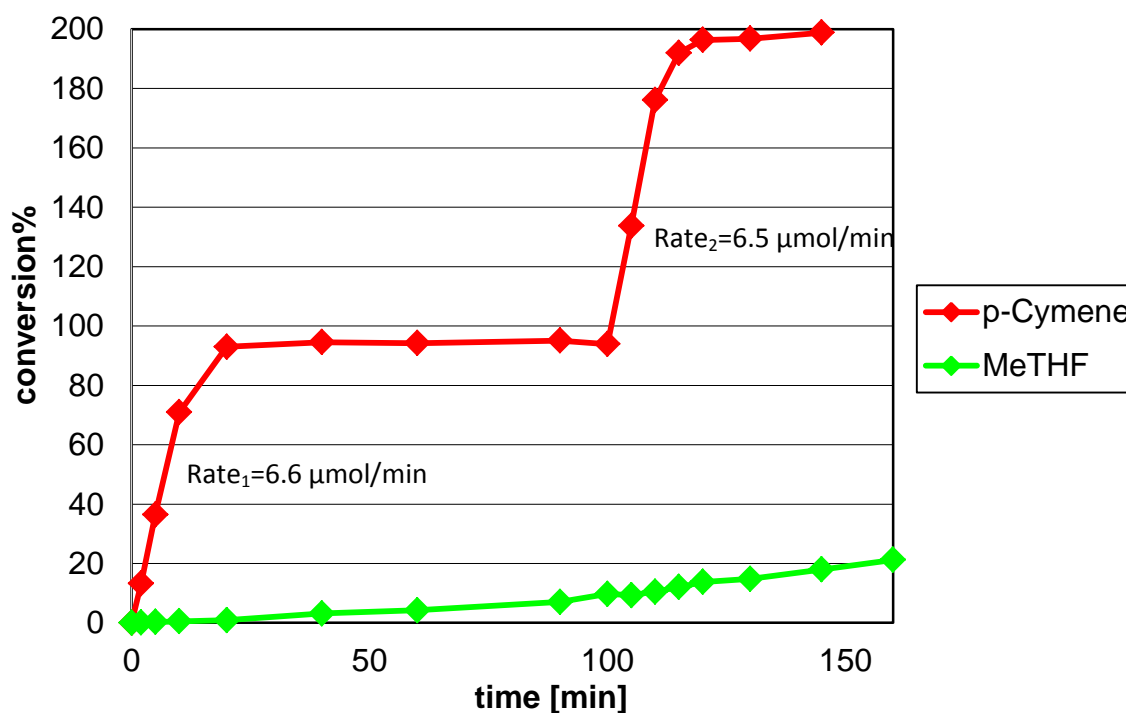

p-Cymene and in 2-methylTHF were chosen as solvents for the catalyst's reusability tests. The first run was performed according to the experimental procedure presented.

As for the reaction in p-cymene, the addition of fresh reagents after 100 minutes of reaction (2mmol lauric acid : 2mmol hexanol) showed approximately 100% retention of the catalyst's activity ( $\text{Rate}_2/\text{Rate}_1 = 0.98$ ).

Similar observations can be made as for the reusability in 2-MeTHF, however with rather low conversion and reaction rate.

This is especially promising for the application of Novozym435 in continuous flow reactors.

### Influence of the amount of catalyst:

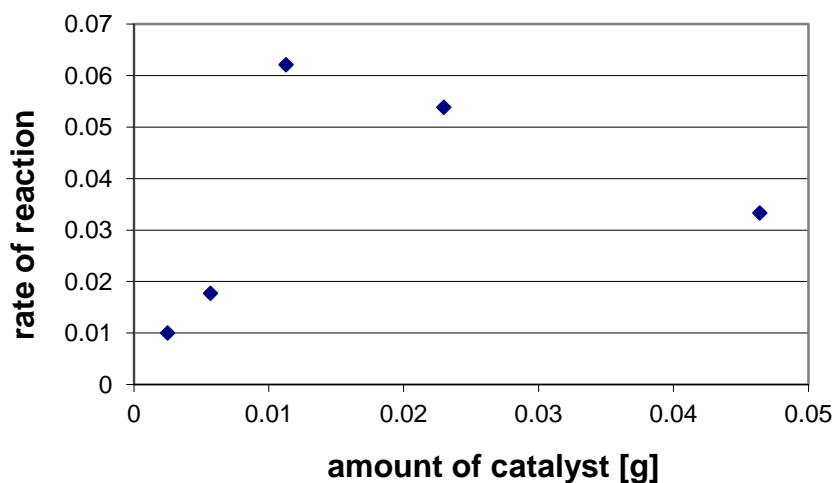

It was found that catalyst load in the range from 10 to 20mg was the most effective for this reaction under the conditions employed.

### Scale up

The reaction was performed in 30 grams scale in *p*-cymene with the same procedure described, yielding 98% product.

### Catalyst-free tests

Test reactions in solvent-free conditions have been carried out applying the typical experimental protocol, both in presence and absence of the biocatalyst. The starting material **lauric acid** represented as **blue diamonds**; **hexyl laurate** product represented as **red squares**.

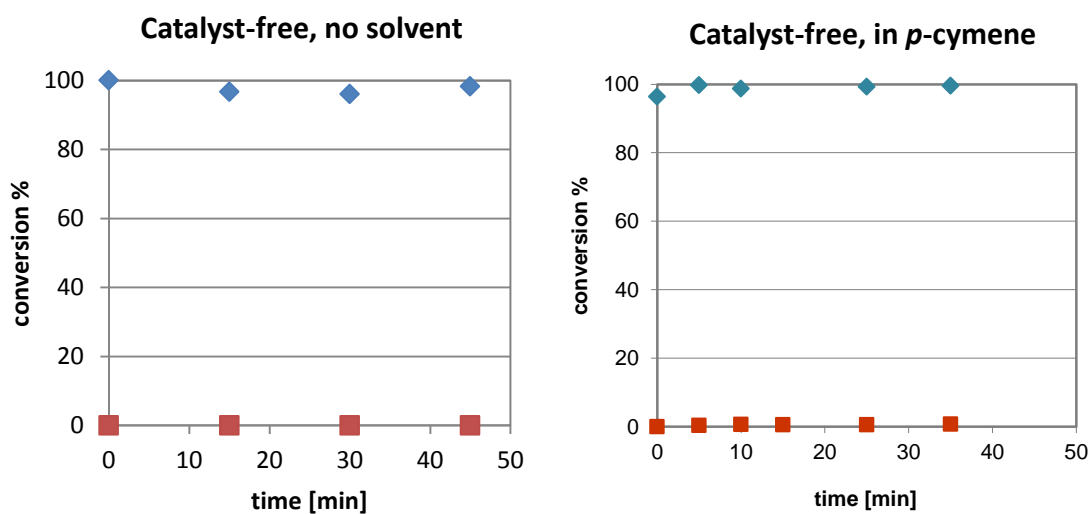

The biocatalyst has proven to be a crucial component of the synthesis, since no conversion of the starting material into the final product has been observed in absence of the catalyst both in *p*-cymene and in solvent-free conditions.
